# Supplementary material for: Pristine graphene covalent functionalization with aromatic aziridines and their application in the sensing of volatile amines – an ab initio investigation
Source: Royal Society of Chemistry journal article supplement (doi:10.1039/d0ra09964c), 2021-01-01
Supplement: d0ra09964c1.pdf [file d0ra09964c1.pdf]

Electronic Supplementary Information

## Pristine graphene covalent functionalization with aromatic aziridines and their application in the sensing of volatile amines – An ab initio investigation

Sabrine Baachaoui,<sup>a,b</sup> Sarah Aldulaijan,<sup>b</sup> Fayçal Raouafi,<sup>c</sup> Rafaa Besbes,<sup>a</sup> Luca Sementa,<sup>d</sup> Alessandro Fortunelli,<sup>d\*</sup> Nouredine Raouafi<sup>a\*</sup> and Adnene Dhouib<sup>b\*</sup>

### Optimization of the charge density energy cutoff

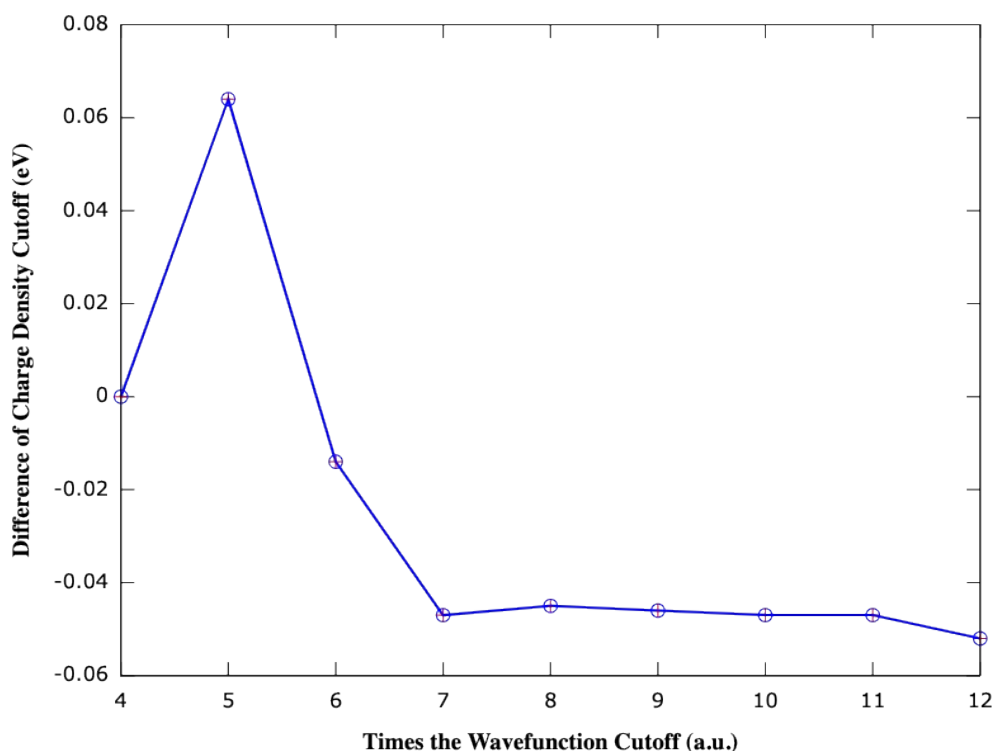

**Figure S1.** Variation of the difference of the charge density energy cutoff ( $E_{\text{cutRho}}$ ) in function of the number of the wavefunction cutoff ( $E_{\text{cutWFC}}$ ) showing stabilization of the difference above  $E_{\text{cutRho}} = 7 \times E_{\text{cutWFC}}$ .

### Optimization of the supercell size

**Table S1.** Adsorption energies for the 5×5, 6×6 and 7×7 graphene supercells in presence of 2b adsorbate and per elementary cell of graphene

|                                         | 5×5 Supercell | 6×6 Supercell | 7×7 Supercell |
|-----------------------------------------|---------------|---------------|---------------|
| $E_{\text{ads}}/\text{supercell}$       | -0.72         | -0.84         | -0.97         |
| $E_{\text{ads}}/\text{elementary cell}$ | -0.029        | -0.023        | 0.020         |

## Charge density difference plots

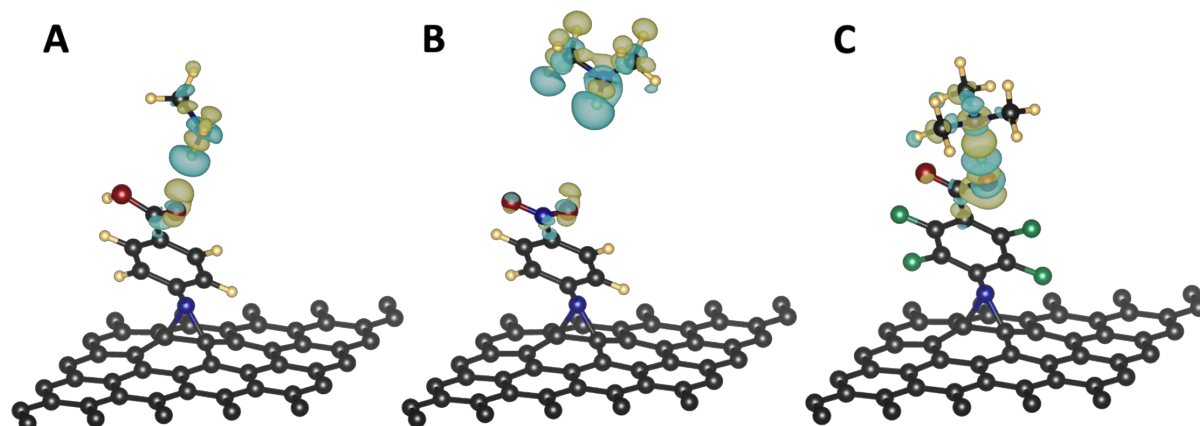

**Figure S2.** Selected views for the charge density differences brought about by the interaction of functionalized graphene with an amine computed for A) g55/**3a** with methylamine, B) g55/**3b** with dimethylamine and C) g55/**3c** with trimethylamine (yellow: regions of charge gain and blue: regions of charge depletion). Values the isosurfaces for the plots of charge density differences are: (A)  $7.5 \times 10^{-4}$ , (B)  $1.5 \times 10^{-4}$  and (C)  $2.5 \times 10^{-3}$  e/Bohr<sup>3</sup>.
